# Supplementary material
Source: HighWire-hosted journal article supplement (http://asnr-client.stage.highwire.org/highwire/filestream/183101/field_highwire_adjunct_files/0/0176.pdf)
Supplement: 0176.pdf [file 0176.pdf]

Supplementary Table. Summary of Thyroid Imaging Reporting and Data System in Guidelines

|                        | Sonographic Features                                                                                                                                                                                                                                                  | Suggested Risk of Malignancy (%) | Recommendation                            |
|------------------------|-----------------------------------------------------------------------------------------------------------------------------------------------------------------------------------------------------------------------------------------------------------------------|----------------------------------|-------------------------------------------|
| <b>ATA-TIRADS</b>      |                                                                                                                                                                                                                                                                       |                                  |                                           |
| High suspicion         | Solid hypoechoic nodule or solid hypoechoic component of a partially cystic nodule with one or more of the following features: irregular margins, microcalcifications, the TDW shape, rim calcifications with small extrusive soft tissue component, evidence of ETE; | > 70-90                          | $\geq 1.0$ cm                             |
| Intermediate suspicion | Hypoechoic solid nodule with smooth margins without microcalcifications, ETE, or TDW shape                                                                                                                                                                            | 10-20                            | $\geq 1.0$ cm                             |
| Low suspicion          | Isoechoic or hyperechoic solid nodule, or partially cystic nodule with eccentric solid areas, without microcalcification, irregular margin or ETE, or TDW shape.                                                                                                      | 5-10                             | $\geq 1.5$ cm                             |
| Very low suspicion     | Spongiform or partially cystic nodules without any of the sonographic features described in low, intermediate, or high suspicion patterns;                                                                                                                            | < 3                              | Consider FNAB when diameter $\geq 2.0$ cm |
| Benign                 | Purely cystic nodules (no solid component).                                                                                                                                                                                                                           | < 1                              | Not indicated                             |
| <b>K-TIRADS</b>        |                                                                                                                                                                                                                                                                       |                                  |                                           |
| High suspicion         | Solid hypoechoic nodule with any of three suspicious US features (microcalcification, nonparallel orientation, spiculated/microlobulated margin);                                                                                                                     | > 60                             | $\geq 1.0$ cm                             |

|                        |                                                                                                                                                                  |       |                           |
|------------------------|------------------------------------------------------------------------------------------------------------------------------------------------------------------|-------|---------------------------|
| Intermediate suspicion | 1) Solid hypoechoic nodule without any of three suspicious US features or 2) Partially cystic or isohyperechoic nodule with any of three suspicious US features; | 15-50 | $\geq 1.0$ cm             |
| Low suspicion          | Partially cystic or isohyperechoic nodule without any of three suspicious US features;                                                                           | 3-15  | $\geq 1.5$ cm             |
| Benign                 | 1) Spongiform, 2) Partially cystic nodule with comet tail artifact, 3) Pure cyst.                                                                                | < 3   | $\geq 2.0$ cm (selective) |
| No nodule              | -                                                                                                                                                                | -     | Not applicable            |

Note. ATA-TIRADS, American Thyroid Association-Thyroid Imaging Reporting and Data System; ETE = extrathyroidal extension; FNAB, fine-needle aspiration biopsy; K-TIRADS, Korean Society of Thyroid Radiology-Thyroid Imaging Reporting and Data System; TDW = taller than wide.

Supplementary Table. Diagnostic performance by radiologist and CAD system based on TIRADS and dichotomous outcome classification.

|                                               | Sensitivity    | Specificity    | PPV            | NPV            | Accuracy       | False positive | False negative |
|-----------------------------------------------|----------------|----------------|----------------|----------------|----------------|----------------|----------------|
| CAD based on K-TIRADS (category 3,4, and 5)   | 97.6 (163/167) | 21.6 (62/287)  | 42.0 (163/388) | 93.9 (62/66)   | 49.6 (225/454) | 78.4 (225/287) | 2.4 (4/167)    |
| CAD based on K-TIRADS (category 4 and 5)      | 89.2 (149/167) | 50.2 (144/287) | 51.0 (149/292) | 88.9 (144/162) | 64.5 (293/454) | 49.8 (143/287) | 10.8 (18/167)  |
| CAD based on ATA-TIRADS (category 3,4, and 5) | 94.6 (158/167) | 29.6 (85/287)  | 43.9 (158/360) | 90.4 (85/94)   | 53.5 (243/454) | 70.4 (202/287) | 5.4 (9/167)    |
| CAD based on ATA-TIRADS (category 4 and 5)    | 87.4 (146/167) | 63.4 (182/287) | 58.2 (146/251) | 89.7 (182/203) | 72.2 (328/454) | 36.6 (105/287) | 12.6 (21/167)  |
| CAD based on possible diagnosis               | 81.4 (136/167) | 81.9 (235/287) | 72.3 (136/188) | 88.3 (235/266) | 81.7 (371/454) | 18.1 (52/287)  | 18.6 (31/167)  |
| Radiologist K-TIRADS (category 3,4, and 5)    | 97.6 (163/167) | 36.2 (104/287) | 47.1 (163/346) | 96.3 (104/108) | 58.8 (267/454) | 63.8 (183/287) | 2.4 (4/167)    |
| Radiologist K-TIRADS (category 4 and 5)       | 91.6 (153/167) | 76.7 (220/287) | 69.5 (153/220) | 94.0 (220/234) | 82.2 (373/454) | 23.3 (67/287)  | 8.4 (14/167)   |
| Radiologist ATA-TIRADS (category 3,4, and 5)  | 89.8 (150/167) | 44.3 (127/287) | 48.4 (150/310) | 88.2 (127/144) | 61.0 (277/454) | 55.7 (160/287) | 10.2 (17/167)  |
| Radiologist ATA-TIRADS (category 4 and 5)     | 83.8 (140/167) | 80.8 (232/287) | 71.8 (140/195) | 89.6 (232/259) | 81.9 (372/454) | 19.2 (55/287)  | 16.7 (27/167)  |
| Radiologist based on possible diagnosis       | 82.0 (137/167) | 95.8 (275/287) | 91.9 (137/149) | 90.2 (275/305) | 90.7 (412/454) | 4.2 (12/287)   | 18.0 (30/167)  |

Note: The numbers are percentages. Category 5, 4, and 3 refer to high, intermediate, and low suspicion nodules in each guideline. ATA-TIRADS,

American Thyroid Association- Thyroid Imaging Reporting and Data System; CAD, computer-aided diagnosis; K-TIRADS, Korean Society of Thyroid

Radiology-Thyroid Imaging Reporting and Data System; PPV, positive predictive value; NPV, negative predictive value
